# Supplementary material for: NIT_CH: A Study Protocol for Evaluating the Effect of Inorganic Nitrate Capsules in Chronic Hypertensive Pregnancies – A Triple-Blind Placebo-Controlled Randomized Trial
Source: Research Square preprint supplement (doi:10.21203/rs.3.rs-8157989/v1), 2025-12-15
Supplement: Supplementary file 1 [file 36fd78c5ec298d61a2c7317d.docx]

Table 1: Schedule of Events and Participant Timeline for the Clinical Trial NIT_CH

|  | Enrolment | Allocation | Post-Allocation | | | | | | | | | Close-out | |
| --- | --- | --- | --- | --- | --- | --- | --- | --- | --- | --- | --- | --- | --- |
| Timepoint | Before 16 weeks gestation | Visit 1  (16 weeks) | Visit 1  (16 weeks) | Visit 2  (20 weeks) | Visit 3  (24 weeks) | Visit 4  (28 weeks) | Visit 5 (32 weeks) | Visit 6 (34 weeks) | Visit 7 (36 weeks) | Visit 8 (37 weeks) | Visit 9 (38 weeks) | End of Pregnancy | |
| ENROLMENT | | | | | | | | | | | | |
| Eligibility screen |  |  |  |  |  |  |  |  |  |  |  |  | |
| Informed consent |  |  |  |  |  |  |  |  |  |  |  |  | |
| Questionnaires (demographic, clinical and dietary) |  |  |  |  |  |  |  |  |  |  |  |  | |
| Allocation |  |  |  |  |  |  |  |  |  |  |  |  | |
| INTERVENTION | | | | | | | | | | | | |
| Intervention |  |  |  | | | | | | | | | | |
| Placebo |  |  |  | | | | | | | | | | |
| ASSESSEMENTS | | | | | | | | | | | | |
| Clinical parameters (blood pressure; weight; anti-hypertensive medication; incidence of Preeclampsia) |  |  |  |  |  |  |  |  |  |  |  |  | |
| Ultrasound and doppler (fetal growth; uterine arteries; middle cerebral artery and umbilical artery) |  |  |  |  |  |  |  |  |  |  |  |  | |
| Perinatal Outcomes |  |  |  |  |  |  |  |  |  |  |  |  | |
| Blood Profile and Urine |  |  |  |  |  |  |  |  |  |  |  |  | |
| Blood biomarkers |  |  |  |  |  |  |  |  |  |  |  |  | |
